# Supplementary material for: Novel Recombinant Newcastle Disease Virus-Based In Ovo Vaccines Bypass Maternal Immunity to Provide Full Protection from Early Virulent Challenge
Source: MDPI journal article supplement (doi:10.3390/vaccines9101189), 2021-10-15
Supplement: s1 [file s1]

Supplemental Figure S1A. Schematic representation of the final recombinant constructs: a) ZJ1\*L-IL4R and b) LS-IL4R

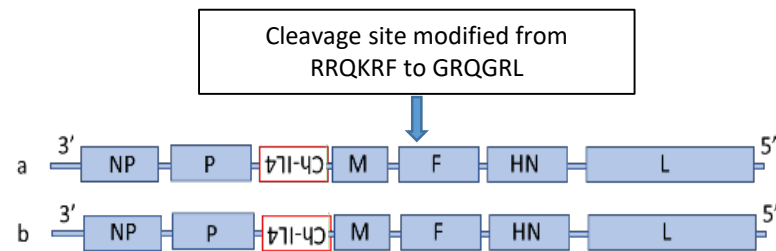

Supplemental Figure S1B. Schematic representation of the experiment

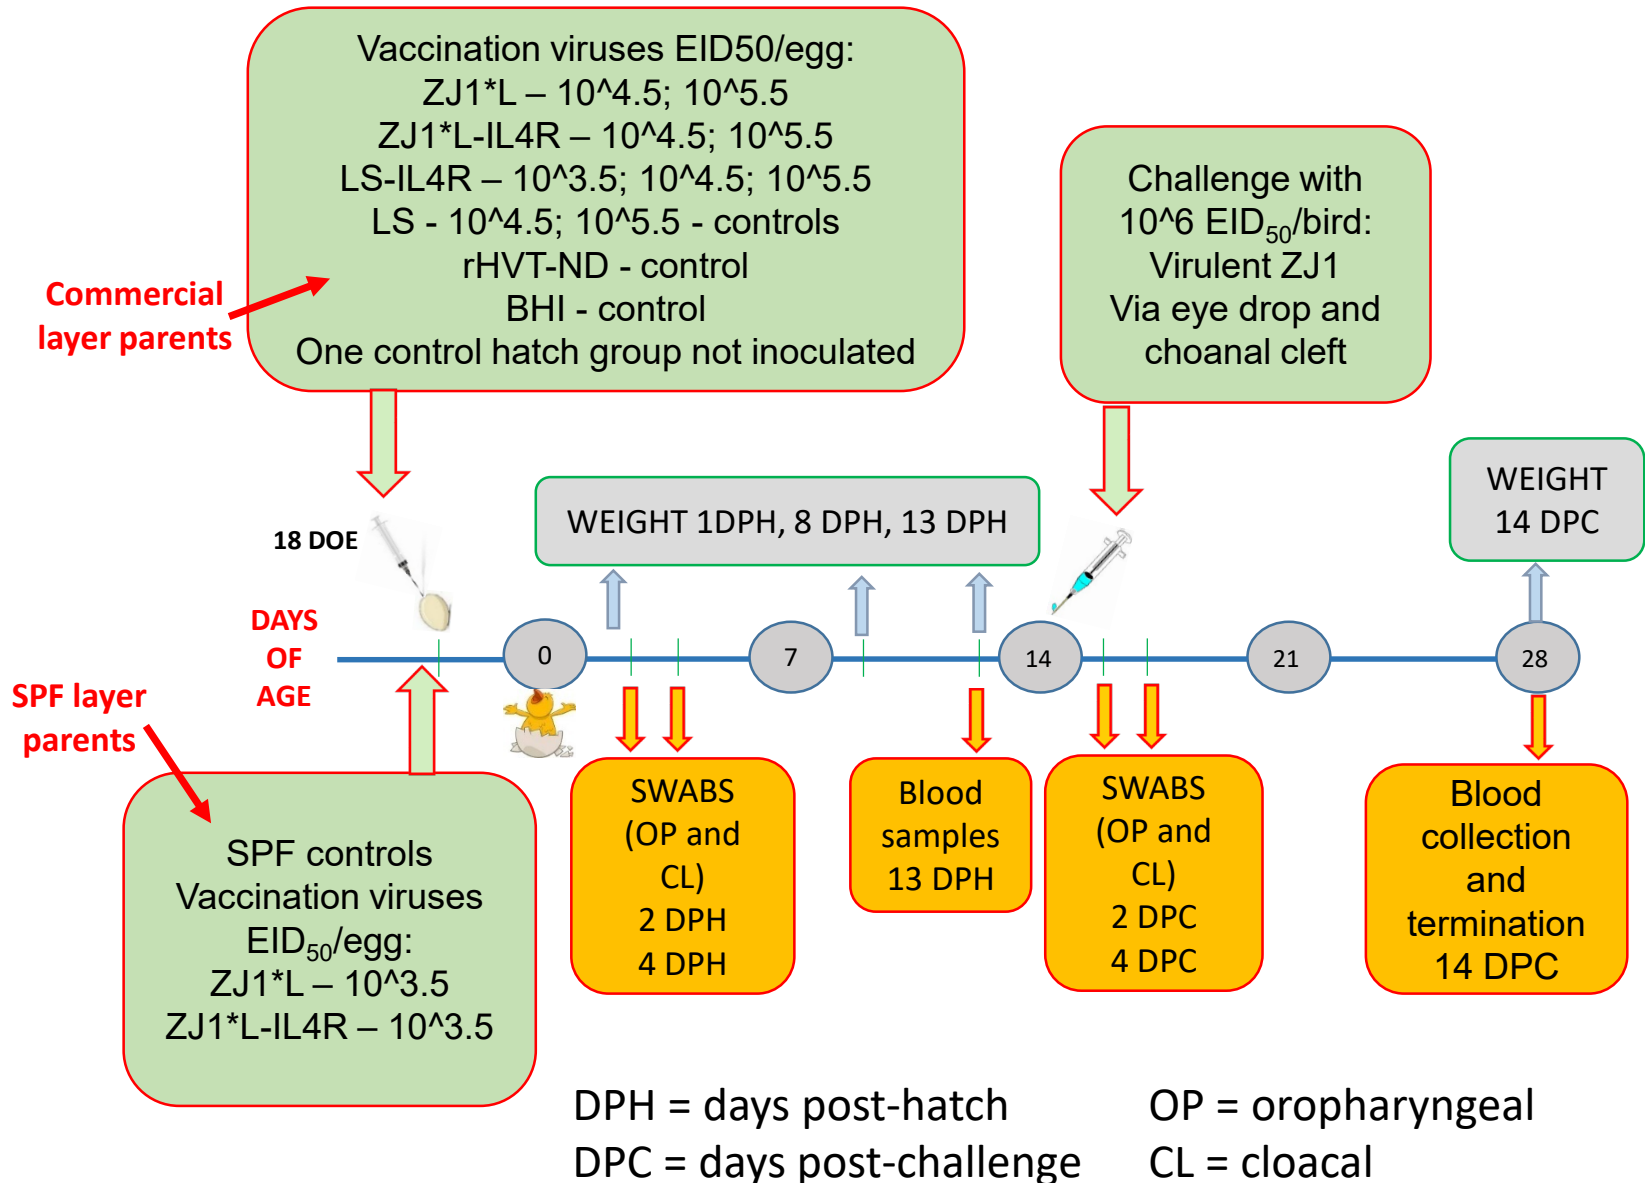

Supplemental Figure S1C. Table representation of the experiment with groups

| Group | Vaccine/inoculum<br>0.1mL<br>Oculo-nasal | Dose<br>EID <sub>50</sub> /0.1mL | Number<br>of<br>hatched<br>eggs | Bleeding<br>for<br>maternal<br>antibody<br>levels | Weight<br>measuring | Swab<br>collection<br>(OP and<br>CL) | Blood<br>collection | Challenge<br>with<br>virulent<br>NDV<br>10^6<br>EID <sub>50</sub> /bird | Swab collecti<br>on (OP<br>and CL) | Blood<br>collection |
|-------|------------------------------------------|----------------------------------|---------------------------------|---------------------------------------------------|---------------------|--------------------------------------|---------------------|-------------------------------------------------------------------------|------------------------------------|---------------------|
| 1     | None – hatch<br>control                  | -                                | 26                              | 5 birds at<br>hatch                               | 1,8, 13<br>DPH      | 2 and 4<br>DPH                       | 13 DPH              | 14 DPH                                                                  | 2 and 4<br>DPC                     | 14 DPC              |
| 2     | BHI control                              | -                                | 26                              | 5 birds at<br>hatch                               |                     |                                      |                     |                                                                         |                                    |                     |
| 3     | rHVT-ND control                          | Manufacturer<br>recommendations  | 21                              | NONE                                              |                     |                                      |                     |                                                                         |                                    |                     |
| 4     | ZJ1*L                                    | 10^4.5                           | 21                              |                                                   |                     |                                      |                     |                                                                         |                                    |                     |
| 5     | ZJ1*L                                    | 10^5.5                           | 21                              |                                                   |                     |                                      |                     |                                                                         |                                    |                     |
| 6     | ZJ1*L-IL4R                               | 10^4.5                           | 21                              |                                                   |                     |                                      |                     |                                                                         |                                    |                     |
| 7     | ZJ1*L-IL4R                               | 10^5.5                           | 21                              |                                                   |                     |                                      |                     |                                                                         |                                    |                     |
| 8     | LS-IL4R                                  | 10^3.5                           | 21                              |                                                   |                     |                                      |                     |                                                                         |                                    |                     |
| 9     | LS-IL4R                                  | 10^4.5                           | 21                              |                                                   |                     |                                      |                     |                                                                         |                                    |                     |
| 10    | LS-IL4R                                  | 10^5.5                           | 21                              |                                                   |                     |                                      |                     |                                                                         |                                    |                     |
| 11    | ZJ1*L – SPF                              | 10^3.5                           | 20                              |                                                   |                     |                                      |                     |                                                                         |                                    |                     |
| 12    | ZJ1*L-IL4R – SPF                         | 10^3.5                           | 21                              |                                                   |                     |                                      |                     |                                                                         |                                    |                     |
| 13    | LS control                               | 10^4.5                           | 21                              |                                                   |                     |                                      |                     |                                                                         |                                    |                     |
| 14    | LS control                               | 10^5.5                           | 19                              |                                                   |                     |                                      |                     |                                                                         |                                    |                     |
|       |                                          |                                  |                                 |                                                   |                     | DEAD                                 | NA                  | NA                                                                      | NA                                 |                     |

DPH = days post-hatch  
DPC = days post-challenge  
NA = not applicable

OP = oropharyngeal  
CL = cloacal  
DEAD = all birds died by this day
